# Supplementary material for: m5CRegpred: Epitranscriptome Target Prediction of 5-Methylcytosine (m5C) Regulators Based on Sequencing Features
Source: MDPI journal article supplement (doi:10.3390/genes13040677), 2022-04-12
Supplement: s1 [file s1]

Table S1 Cross-validation with different features

|            | Mature mRNA model |       |        | Full transcript model |       |        | Average |
|------------|-------------------|-------|--------|-----------------------|-------|--------|---------|
|            | NSUN2             | YBX1  | ALYREF | NSUN2                 | YBX1  | ALYREF |         |
| EIIP       | 0.711             | 0.759 | 0.809  | 0.680                 | 0.669 | 0.686  | 0.719   |
| autoCor    | 0.509             | 0.601 | 0.603  | 0.480                 | 0.499 | 0.604  | 0.549   |
| crossCor   | 0.561             | 0.647 | 0.650  | 0.554                 | 0.515 | 0.515  | 0.574   |
| PseKNC     | 0.649             | 0.746 | 0.767  | 0.623                 | 0.649 | 0.657  | 0.682   |
| ChemProper | 0.602             | 0.718 | 0.748  | 0.575                 | 0.645 | 0.704  | 0.665   |
| ONE_HOT    | 0.623             | 0.718 | 0.740  | 0.595                 | 0.641 | 0.693  | 0.668   |
| CONPOSI    | 0.712             | 0.771 | 0.826  | 0.717                 | 0.668 | 0.793  | 0.748   |
| PSNP       | 0.858             | 0.787 | 0.849  | 0.849                 | 0.763 | 0.907  | 0.835   |

Table S2 Independent test with two features combination

|                           | Mature mRNA model |       |        | Full transcript model |       |        |
|---------------------------|-------------------|-------|--------|-----------------------|-------|--------|
|                           | NSUN2             | YBX1  | ALYREF | NSUN2                 | YBX1  | ALYREF |
| EIIP_autoCovar            | 0.647             | 0.728 | 0.841  | 0.719                 | 0.768 | 0.841  |
| EIIP_crossCovar           | 0.659             | 0.716 | 0.847  | 0.726                 | 0.756 | 0.847  |
| EIIP_PseKNC               | 0.657             | 0.725 | 0.848  | 0.722                 | 0.765 | 0.848  |
| EIIP_ChemicalProper       | 0.602             | 0.650 | 0.778  | 0.706                 | 0.69  | 0.778  |
| EIIP_ONE_HOT              | 0.603             | 0.649 | 0.777  | 0.703                 | 0.689 | 0.777  |
| EIIP_CONPOSI              | 0.656             | 0.724 | 0.849  | 0.721                 | 0.764 | 0.849  |
| autoCovar_crossCovar      | 0.619             | 0.606 | 0.713  | 0.634                 | 0.646 | 0.713  |
| autoCovar_PseKNC          | 0.676             | 0.691 | 0.749  | 0.689                 | 0.731 | 0.749  |
| autoCovar_ChemicalProper  | 0.605             | 0.651 | 0.778  | 0.700                 | 0.691 | 0.778  |
| autoCovar_ONE_HOT         | 0.604             | 0.650 | 0.778  | 0.706                 | 0.690 | 0.778  |
| autoCovar_CONPOSI         | 0.647             | 0.728 | 0.841  | 0.719                 | 0.768 | 0.841  |
| crossCovar_PseKNC         | 0.675             | 0.679 | 0.792  | 0.766                 | 0.719 | 0.792  |
| crossCovar_ChemicalProper | 0.605             | 0.651 | 0.778  | 0.700                 | 0.691 | 0.778  |
| crossCovar_ONE_HOT        | 0.604             | 0.650 | 0.778  | 0.706                 | 0.690 | 0.778  |
| crossCovar_CONPOSI        | 0.659             | 0.716 | 0.847  | 0.726                 | 0.756 | 0.847  |
| PseKNC_ChemicalProper     | 0.660             | 0.695 | 0.801  | 0.772                 | 0.735 | 0.801  |
| PseKNC_ONE_HOT            | 0.654             | 0.694 | 0.798  | 0.766                 | 0.734 | 0.798  |
| PseKNC_CONPOSI            | 0.657             | 0.725 | 0.848  | 0.722                 | 0.765 | 0.848  |
| ChemicalProper_ONE_HOT    | 0.606             | 0.651 | 0.778  | 0.701                 | 0.691 | 0.778  |
| ChemicalProper_CONPOSI    | 0.657             | 0.715 | 0.835  | 0.728                 | 0.755 | 0.835  |
| ONE_HOT_CONPOSI           | 0.654             | 0.715 | 0.836  | 0.730                 | 0.755 | 0.836  |
